# Supplementary material for: Climate change-driven geographical shifts in Aspergillus species habitat and the implications for plant and human health
Source: Research Square preprint supplement (doi:10.21203/rs.3.rs-6545782/v1), 2025-05-02

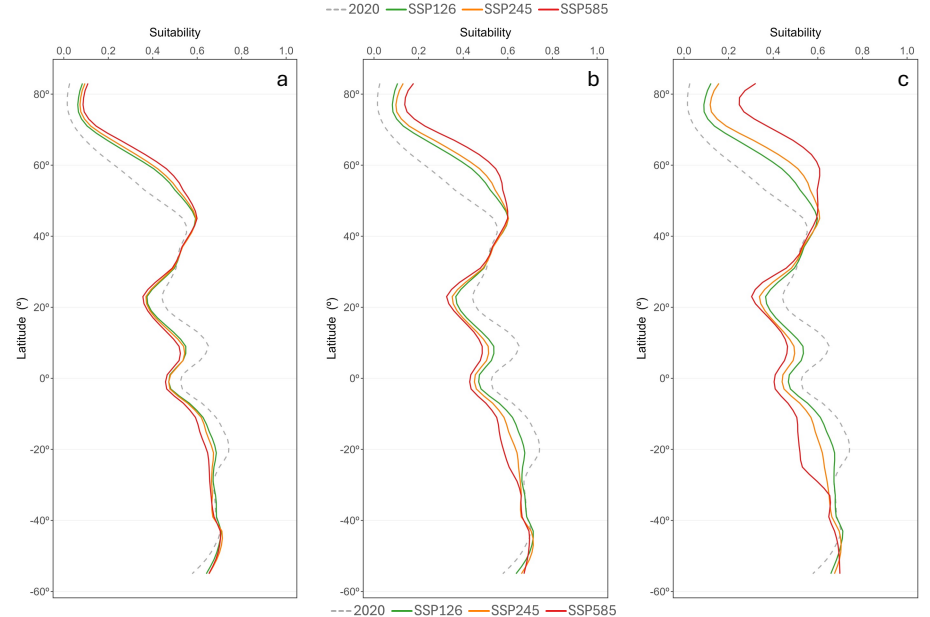

Fig. #. Mean logistic output (probability of presence) according to latitude for *A. fumigatus* under current and future climate modelling scenarios for various SSPs. Future time horizons: (a) 2041-2060, (b) 2061-2080, (c) 2081-2100.

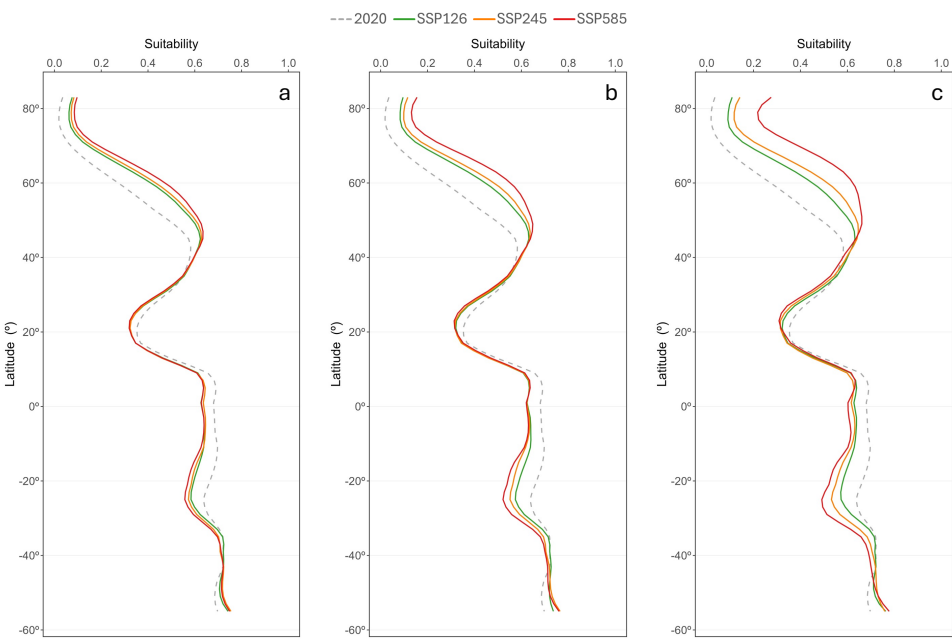

Supplement: Supplementary file 1 [file dd47c1df3838375498187c12.pdf]
